# Supplementary material for: Structure–function analysis of pectate lyase Pel3 reveals essential facets of protein recognition by the bacterial type 2 secretion system
Source: PubMed Central journal article supplement (PMC7949064; doi:10.1016/j.jbc.2021.100305), 2021-01-16
Supplement: mmc1.pdf [file mmc1.pdf]

## Supporting information

### Structure-function analysis of pectate lyase Pel3 reveals essential facets of protein recognition by the bacterial type 2 secretion system.

Camille Pineau, Natalia Guschinskaya, Isabelle Gonçalves, Florence Ruaudel, Xavier Robert, Patrice Gouet, Lionel Ballut, Vladimir E. Shevchik

## Supporting figures

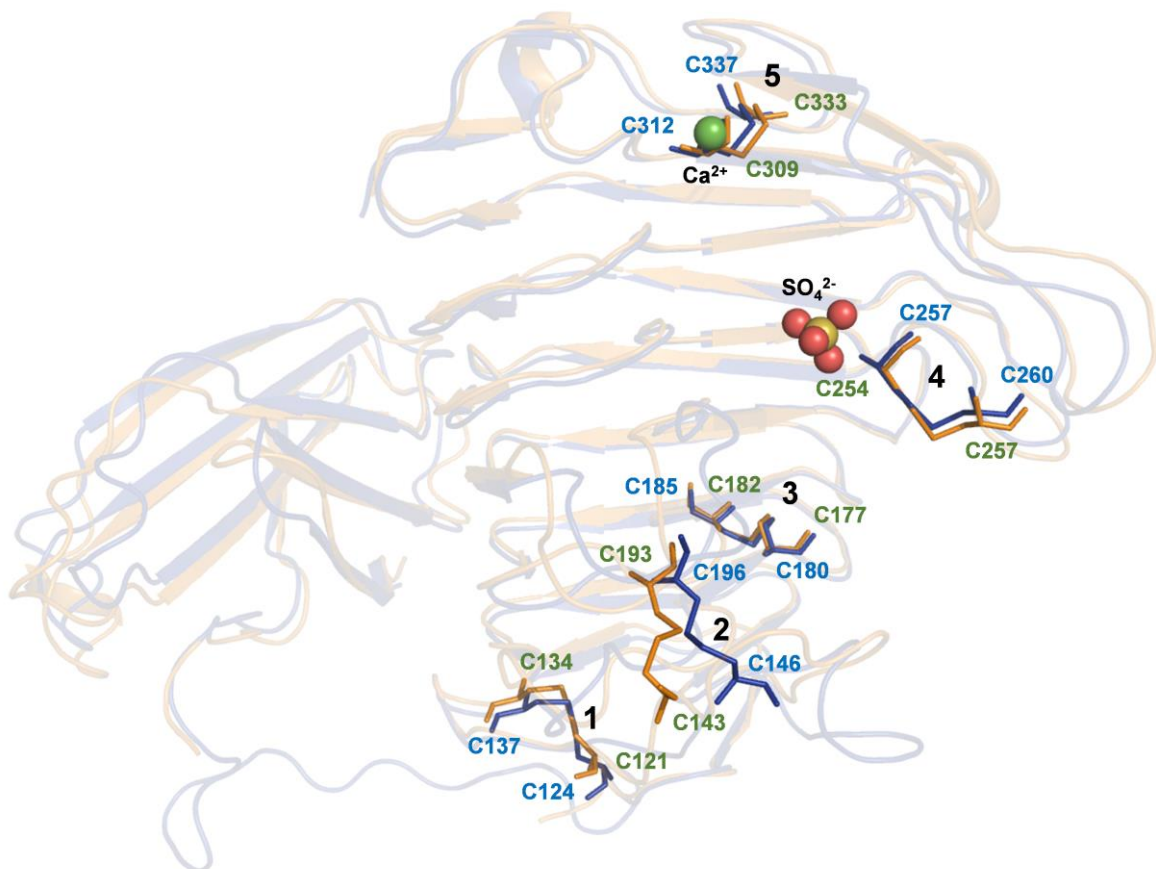

**Figure S1. Conservation of the disulfide bonds in Pel3 and Pel1.** Superposition of Pel3 (blue, PDB 4U49) with Pel1 (orange, PDB 3B4N) shown in transparency. The conserved cysteine residues forming disulfide bonds in the catalytic domain are shown as bold sticks. The disulfide bonds are numbered from 1 to 5 as in the main text. Bound calcium and sulfate ions are shown for Pel3.

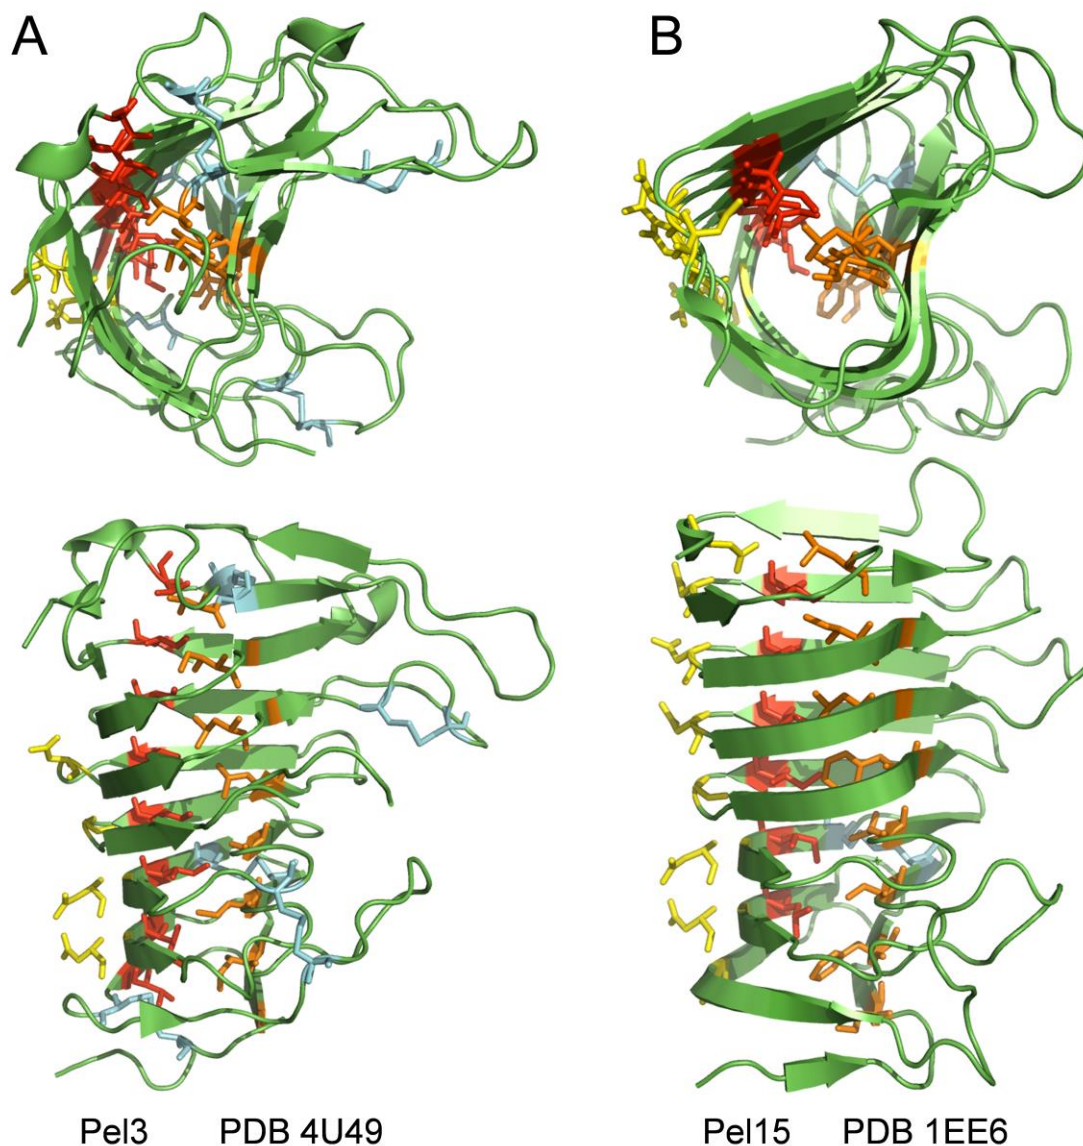

**Figure S2. The PL-3  $\beta$ -helix is stabilized by a series of hydrophobic stacking and an Asn ladder. A and B, bottom and lateral views of Pel3 from *P. carotovorum* (PDB 4U49) and Pel-15 from *Bacillus sp.* KSM-P15 (PDB 1EE6). The hydrophobic core of  $\beta$ -helices is stabilized by a series of hydrophobic interactions between the inward-pointing side chains of several aliphatic residues and Phe. These residues are organized into two regular ladders extending along the  $\beta$ -strands PB1 and PB3, in orange and red, respectively. The Pel-15 structure (B) is additionally stabilized by an Asn ladder (in yellow), extending along the whole length of the  $\beta$ -helix. Only a few Asn residues of this ladder are conserved in Pel3 (A). Note that the Pel3  $\beta$ -helix is apparently less regular than that of Pel-15 and carries some additional loops, short helices and strands. Five disulfide bonds (in cyan) further reinforce the basic  $\beta$ -helix framework and extended loops of Pel3.**

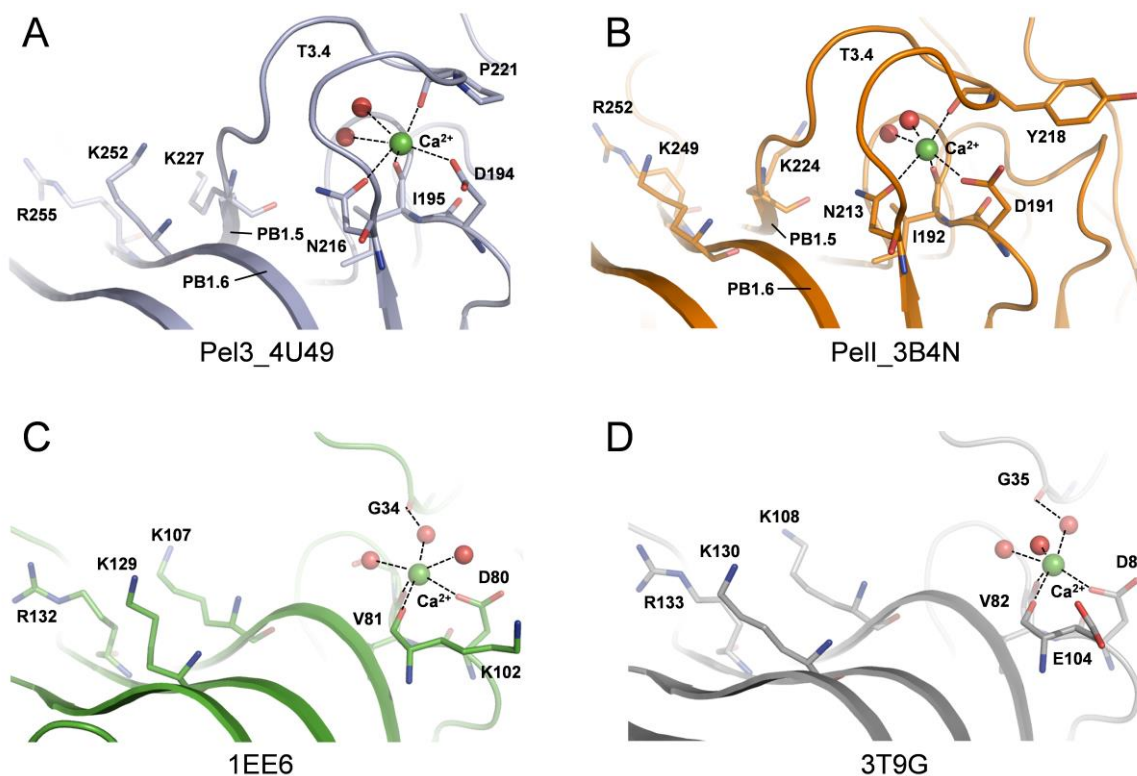

**Figure S3. Catalytic site conservation in the PL-3 family proteins.** **A** and **B**, The invariant residues of Pel3 and Pell present in or adjacent to the catalytic site. Lys<sup>227</sup> (Pel3) and Lys<sup>224</sup> (Pell) represent the catalytic base. Lys<sup>252</sup> and Arg<sup>255</sup> (Pel3) or Lys<sup>249</sup> and Arg<sup>252</sup> (Pell) are implicated in the binding of the substrate. Side chain of Asp<sup>194</sup> and Asn<sup>216</sup> (Pel3) or Asp<sup>191</sup> and Asn<sup>213</sup> (Pell) as well as main chain of Ile<sup>195</sup> and Pro<sup>221</sup> (Pel3) or Ile<sup>192</sup> and Tyr<sup>218</sup> (Pell) plus two water molecules are implicated in calcium coordination and stabilization of loop T3.4. **C** and **D**, In PL-3 from *Bacillus sp.* KSM-P15 (PDB 1EE6) and *C. bescii* (PDB 3T9G), the catalytic residues equivalent to Lys<sup>227</sup>, Lys<sup>252</sup> and Arg<sup>255</sup> of Pel3 as well as Ca-binding Asp are conserved but loop equivalent to T3.4 is absent. In 1EE6 and 3T9G, the main chain carbonyl of Pro<sup>221</sup> (Pel3) and Tyr<sup>218</sup> (Pell) carried by loop T3.4 are replaced by a water molecule.

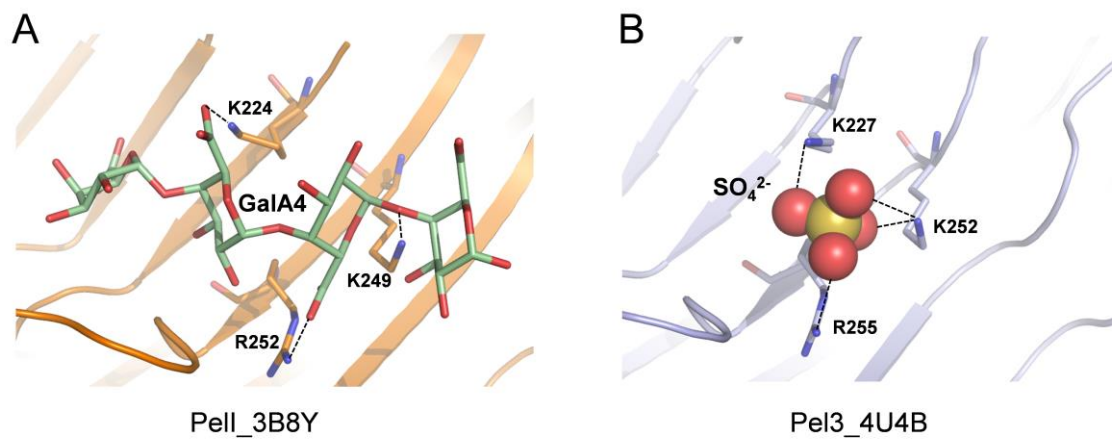

**Figure S4. Sulfate ion mimics the substrate in the catalytic site of Pel3.** Sulfate ion in Pel3 (B) forms salt bridges with Lys<sup>227</sup>, Lys<sup>252</sup> and Arg<sup>255</sup>, mimicking hydroxyl groups of tetragalacturonic acid present in the catalytic site of Pell (A).

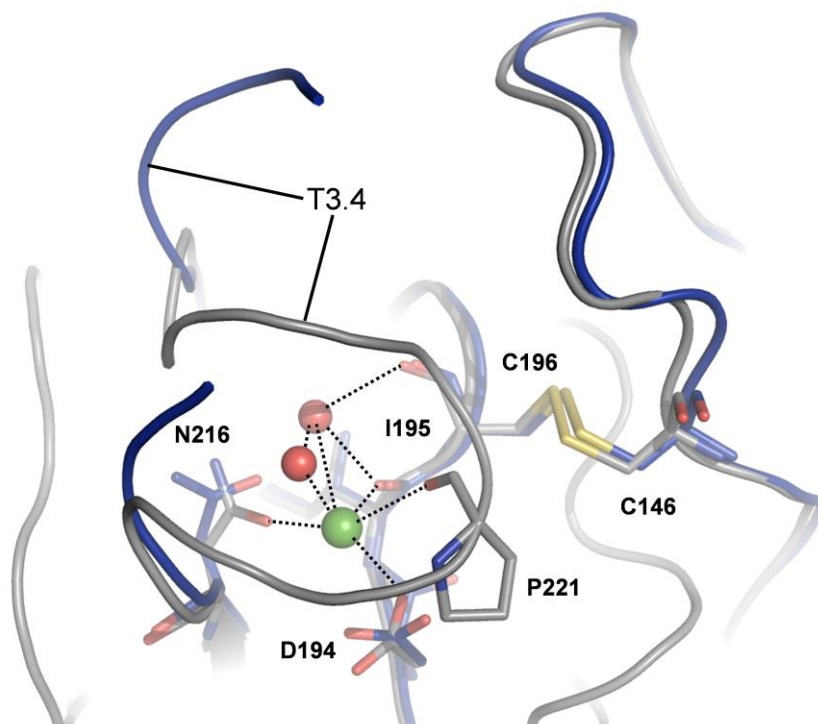

**Figure S5. Destabilization of loop T3.4 in the catalytic domain of Pel3 in the absence of calcium.** Superposition of the loop T3.4 and neighbor regions from monomer A (blue) and monomer B (grey) of Pel3<sub>2m</sub> PDB 4U49. The residues coordinating Ca ion in PDB<sub>1m</sub> and disulfide bond Cys<sub>146</sub>-Cys<sub>196</sub> are shown. In monomer A, the loop T3.4 is destabilized and not visible.

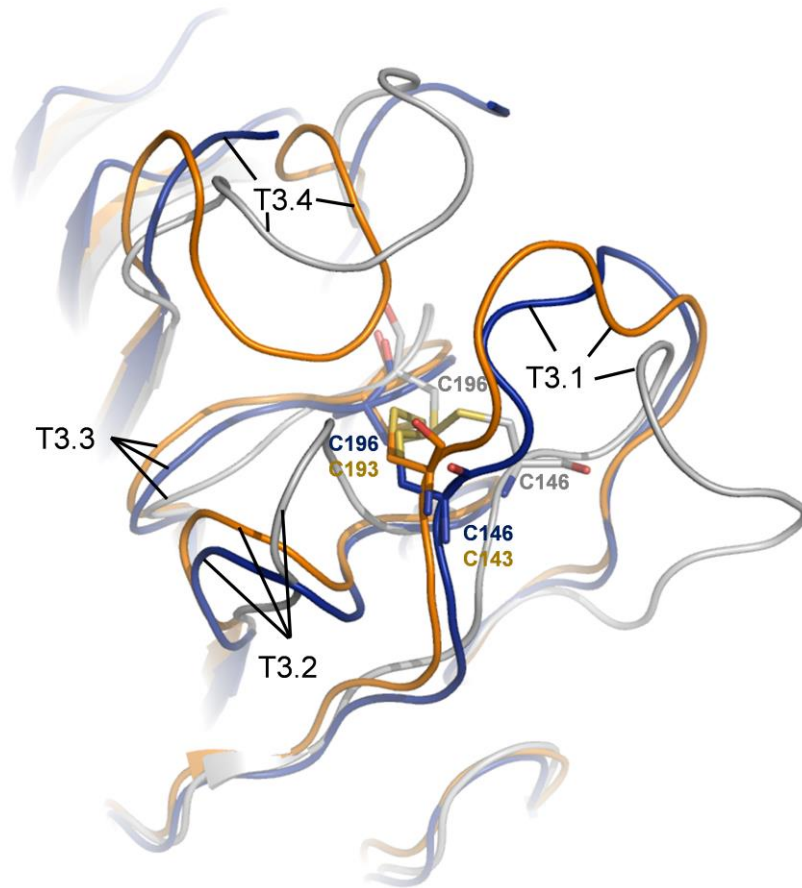

**Figure S6. Loops T3.1, T3.2 and T3.4 are differently arranged in various structures of Pel3 and Pell.** Superposition of the catalytic domains from Pel3<sub>1m</sub> (grey, PDB code 4U4B), Pel3<sub>2m</sub> monomer A (blue, PDB code 4U49) and Pell (orange, PDB code 3B4N): only the protein zones with the exposed loops of interest are shown. Of note, the disulfide bond attaching the loops T3.1 and T3.3 is also displaced between Pel3<sub>1m</sub> and Pel3<sub>2m</sub> structures.

**A**

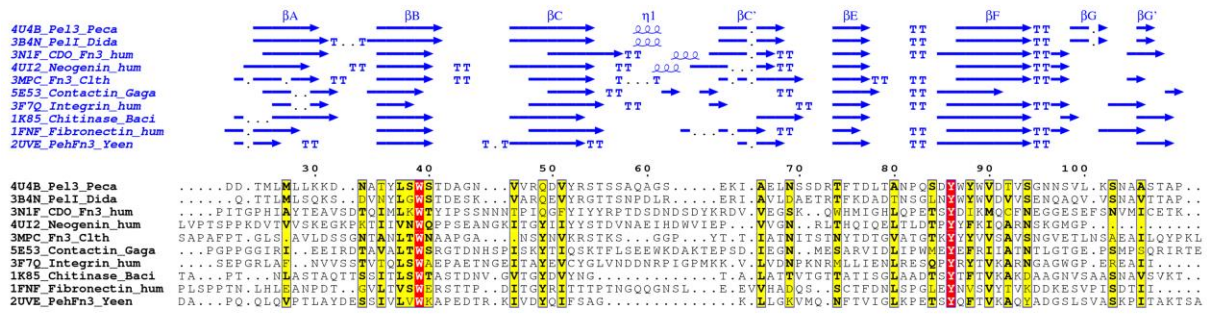

**B**

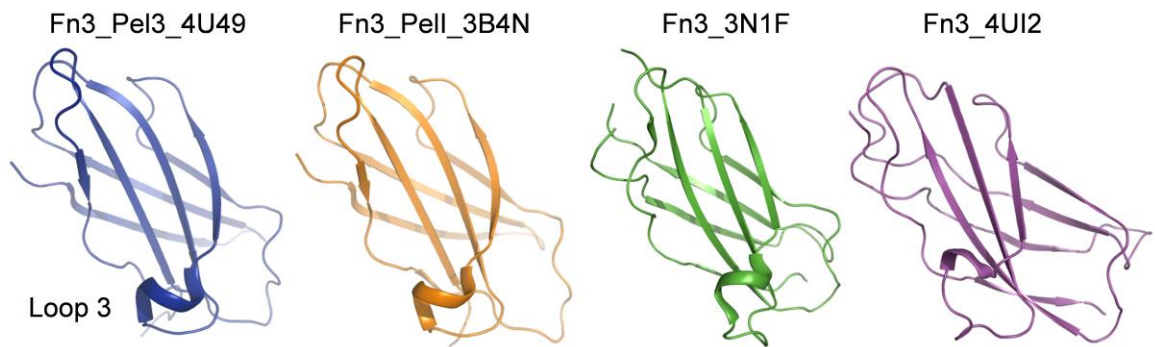

**Figure S7. Fn3 domain of Pel3 is structurally similar to Fn3 domains from eukaryotic signaling proteins. A,** Structure-based sequence alignment of Fn3 domain from Pel3 with its structural homologs identified using the Dali server (Table S3). The PDB codes are 4U4B, pectate lyase Pel3 from *Pectobacterium carotovorum*; 3B4N, pectate lyase Pell from *Dickeya dadantii*; 3N1F, Fn3 domain from human Cell adhesion molecule Down-regulated by Oncogenes (CDO); 4UI2, 5<sup>th</sup> Fn3 domain from human neogenin; 3MPC, Fn3-like protein from *Clostridium thermocellum*; 5E53, Fn3 domain from chicken Contactin-1; 3F7Q, Fn3 domain from human integrin  $\beta$ 4; 1K85, Fn3 domain from *Bacillus circulans* chitinase; 1FNF, Fn3 domain from human fibronectin; 2UVE, Fn3 domain from *Yersinia enterocolitica* exopolysaccharide synthase. The secondary structure elements are shown for each protein. The conserved protein zones are in yellow and red boxes, for similar and identical residues, respectively. **B,** Overall structure conservation between Fn3 domains of Pel3 (PDB 4U49, blue), Pell (PDB 3B4N, orange), CDO (PDB 3N1F, green) and cell surface receptor neogenin NEO1 (PDB 4UI2, violet). Of note, a helix is present in the same place in loop 3 of Pel3 and Pell as well as in two eukaryotic Fn3 domains.

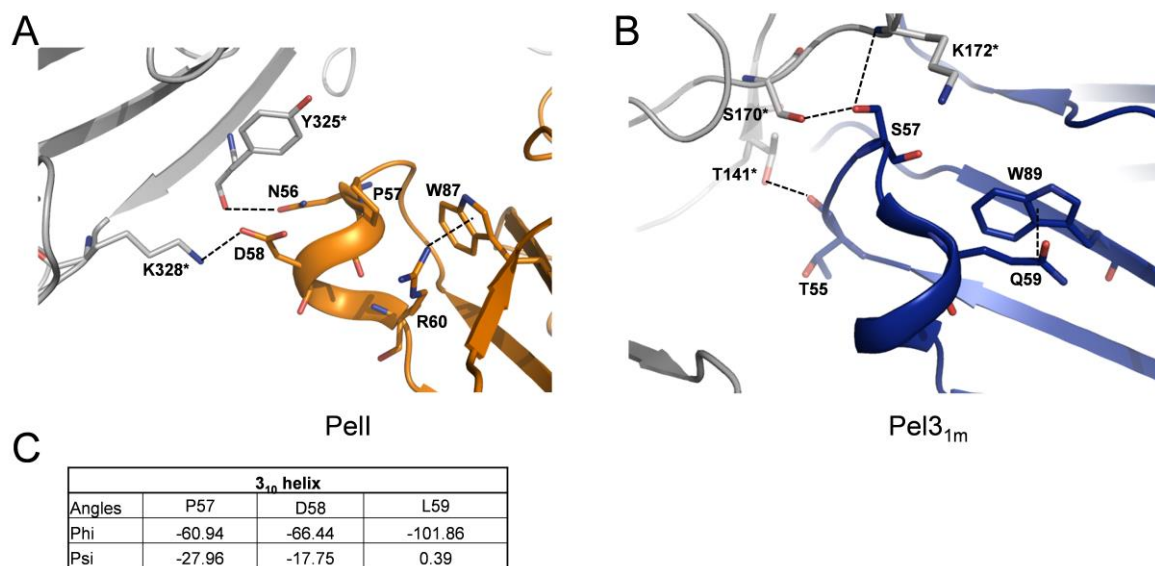

**Figure S8. Stabilization of loop 3 Fn3 in Pell and Pel3.** **A** and **B**, Close up view of the protein zones around of loop 3 Fn3 of Pell (orange, monomer A in PDB 3B4N) and Pel3<sub>1m</sub> (blue, PDB 4U4B). The orientation shows all the interactions between Pell and Pel3 and their respective crystal neighbor in grey (residues numbering with asterisks). The polar  $\pi$  interaction between Gln59 and Trp89 in Pel3 is replaced by a cation  $\pi$  interaction between Arg60 and Trp87 in Pell. **C**, phi and psi angles of residues Pro57, Asp58 and Leu59 forming 3<sub>10</sub> helix in loop 3 of Fn3 Pell.



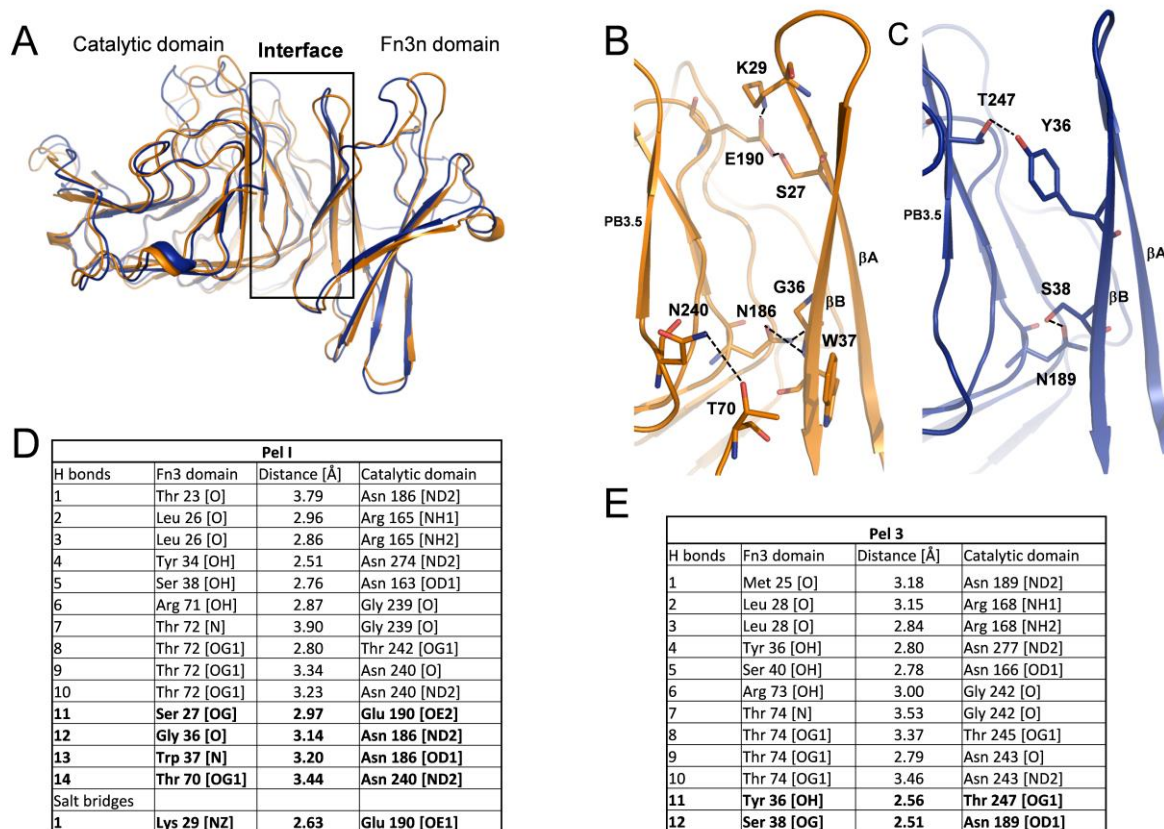

**Figure S9. Organization of the interface between Fn3 and catalytic domains of Pel3 and Pel1.** **A**, superposition of Pel3 (blue, PDB 4U49) with Pel1 (orange, PDB 3B4N) with the catalytic and Fn3 domains arranged around the interface. **B** and **C**, close up view of interdomain interfaces of Pel1 and Pel3 showing polar and ionic interactions specific for each protein. **D** and **E**, The distance of H bonds and salts bridges observed respectively, in the interface of Pel1 and Pel3. Interactions specific for each protein are in bold.

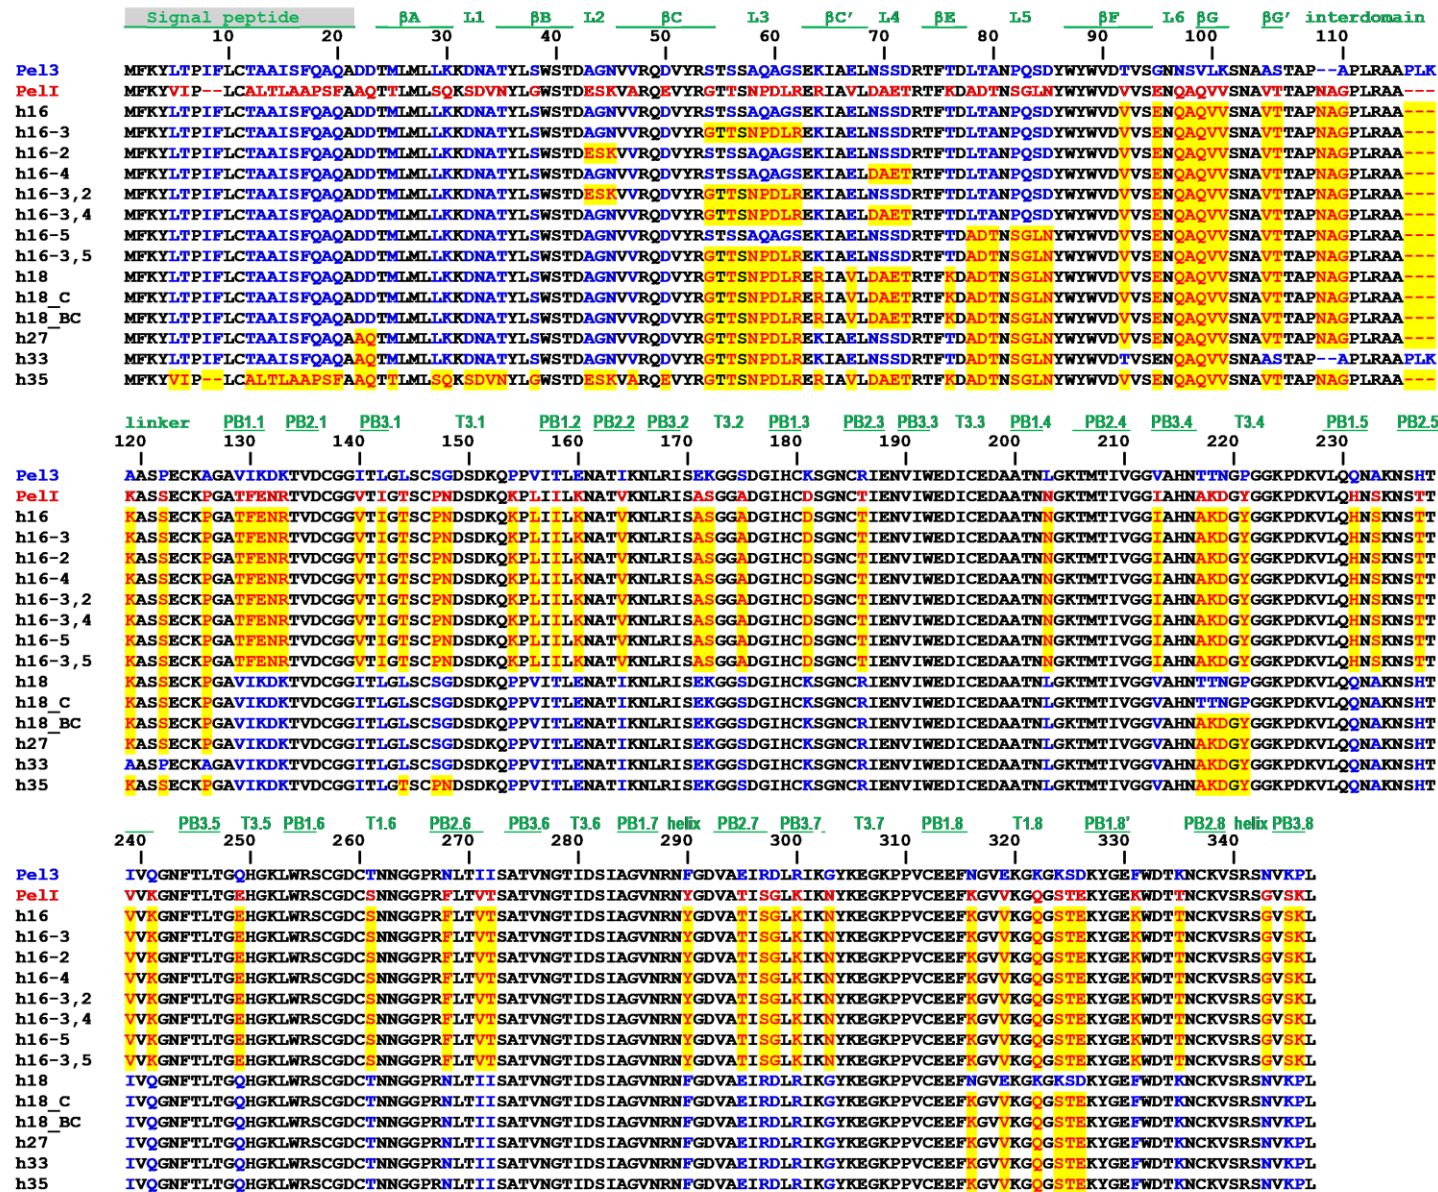

Figure S10. Sequence alignment of Pel3-Pell variants used in this study. The secondary structure elements are shown for *P. carotovorum* Pel3 (PDB 4U4B). The residue numbering is shown for the immature Pel3 polypeptide carrying a signal peptide. The residues conserved between Pel3 and PelI are in black while these specific for Pel3 and PelI are in blue and in red, respectively. The residues conserved in hybrid proteins are highlighted in yellow.

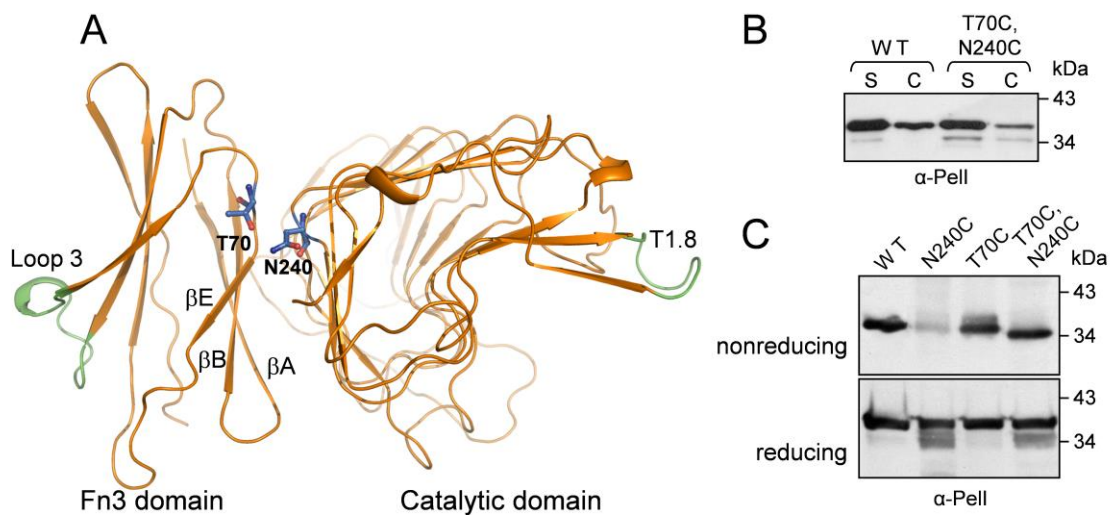

**Figure S11. Locking of the interdomain Fn3/CD interface by disulfide bond does not prevent secretion of Pell.** **A**, Close up view of the Pell interface: the residues substituted with cysteine generating an interdomain cross-linking are shown as blue sticks and loops 3 and T1.8 are in green. **B**, Secretion efficiency of the wild-type Pell and T70C/N240C variant expressed from a plasmid in *D. dadantii* A5159 *pell* strain: immunodetection in cell extract (C) and culture supernatant (S) with antibodies raised against Pell. **C**, Electrophoretic mobility assay. The wild type Pell, the single and double cysteine variants were separated on reducing and non-reducing gels (with and without 2-mercapthoethanol, respectively) and visualized by immunoblotting with anti-Pell. Note that in non-reducing conditions, Pell<sup>T70C/N240C</sup> runs slightly faster than Pell<sup>WT</sup> indicating a more compact overall shape imposed by the interdomain disulfide bond.

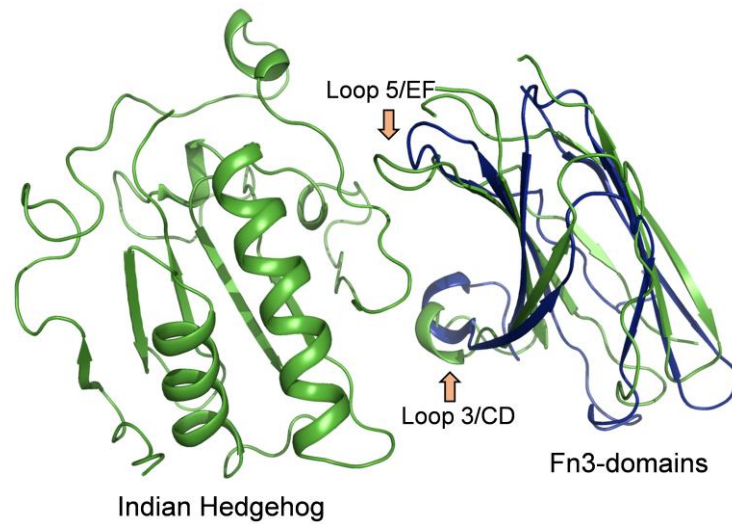

**Figure S12.** Superposition of the Fn3 domains from human Cell adhesion molecule, Down-regulated by Oncogenes (CDO) (PDB 3N1F, green) and Pel3<sub>2m</sub> monomer B (PDB code 4U4B, blue). Human CDO Fn3 interacts with Indian Hedgehog protein (in left): the binding interface involves loops CD and EF of CDO Fn3 (equivalent to loops 3 and 5 of Fn3 Pel3) and the linker from Indian Hedgehog protein.

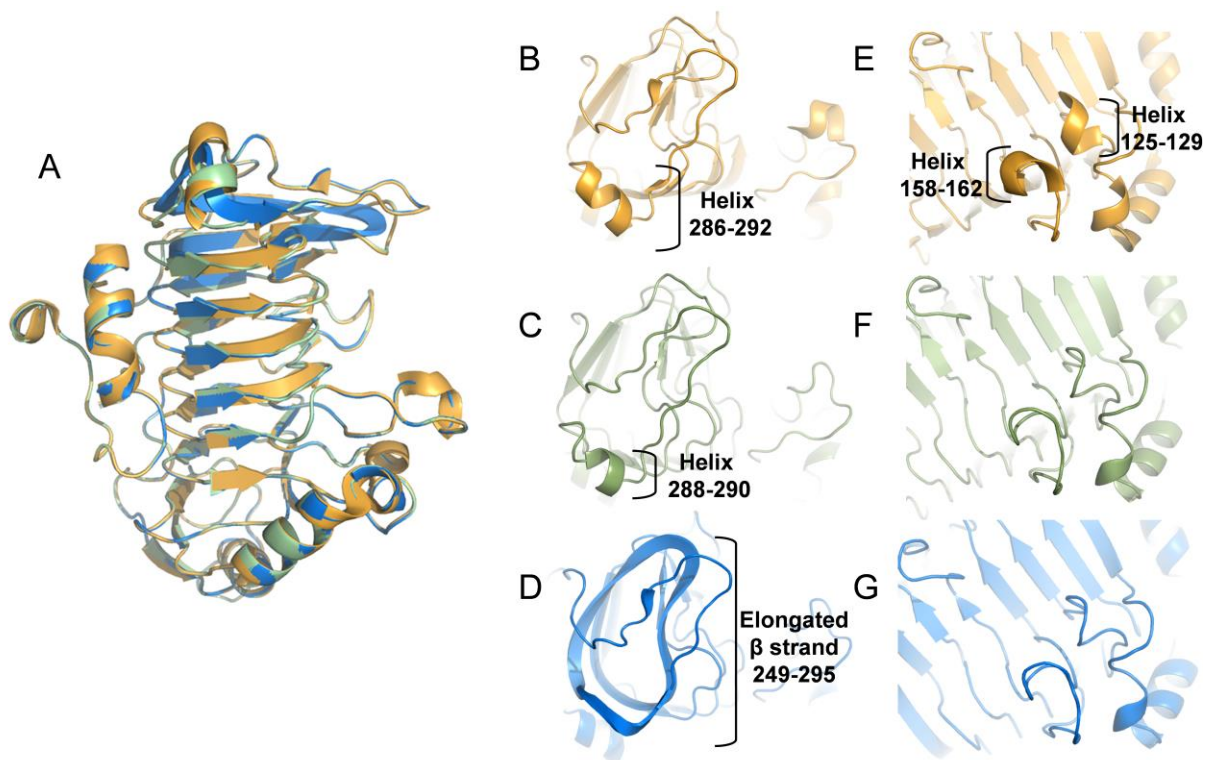

**Fig S13. Structural variations of loop regions in different structures of pectate lyase PelC.** **A**, Overall structure conservation between three different structures of PelC from *Dickeya chrysanthemi* (formerly *Erwinia chrysanthemi*) (PDB entries 1O8I (orange), 2PEC (green) and 1AIR (blue) are superimposed). **B to G**, Close up view showing loop-to-helix or loop-to- $\beta$  strand transition or helix reorganization of indicated protein zones. **B to D**, Helix (residues 286-292) in 1O8I (**B**) is shortened in 2PEC (**C**) and a large protein region including this zone is restructured into a long beta strand in 1AIR (**D**). **E to G**, Two helices (residues 125-129 and 158-162) in 1O8I (**E**) are restructured in loops in 2PEC (**F**) and 1AIR (**G**).

## Supporting Tables

**Table S1. Data collection and refinement statistics**

| Data collection                                         |                                              |                                               |
|---------------------------------------------------------|----------------------------------------------|-----------------------------------------------|
| Code PDB                                                | 4U4B                                         | 4U49                                          |
| Synchrotron beamline                                    | ID29, ESRF                                   | X06DA, SLS                                    |
| Wavelength (Å)                                          | 0.94                                         | 0.98                                          |
| Space group                                             | P2 <sub>1</sub>                              | P2 <sub>1</sub>                               |
| Unit-cell parameters (Å, °)                             | $a = 37.0, b = 44.3, c = 86.2, \beta = 93.6$ | $a = 48.6, b = 72.0, c = 83.7, \beta = 101.3$ |
| Resolution limit (Å)                                    | 2.1 (2.2-2.1)                                | 1.8 (1.9-1.8)                                 |
| Number of measurements                                  | 43,537(3,021)                                | 177,066(25,948)                               |
| Unique reflections                                      | 15,116 (1,389)                               | 52,416 (7,784)                                |
| Completeness (%)                                        | 91.6(65.0)                                   | 99.8(99.8)                                    |
| R <sub>meas</sub> (I) <sup>a</sup> (%)                  | 5.4 (12.7)                                   | 5.1 (49.1)                                    |
| CC(1/2) <sup>b</sup> (%)                                | 99.7(97.3)                                   | 92.4(82.0)                                    |
| Mean I/σ(I)                                             | 19.2 (7.3)                                   | 16.9 (2.8)                                    |
| Crystallographic refinement                             |                                              |                                               |
| Asymmetric unit content                                 | 1 monomer                                    | 2 monomers                                    |
| Number of non-hydrogen protein atoms                    | 2,630                                        | 5,479                                         |
| Number of water molecules                               | 183                                          | 772                                           |
| Other heteroatoms                                       | 9                                            | 1                                             |
| Mean B-factor (Å <sup>2</sup> )                         | 21.0                                         | 25.0                                          |
| R <sub>factor</sub> /R <sub>free</sub> <sup>c</sup> (%) | 17.0/25.0                                    | 17.7/21.4                                     |
| Stereochemical quality of the model                     |                                              |                                               |
| RMSD bond lengths (Å)                                   | 0.008                                        | 0.003                                         |
| RMSD bond angle (°)                                     | 1.1                                          | 0.8                                           |
| Ramachandran plot favored (%)                           | 92.3                                         | 94.2                                          |
| Ramachandran outliers (%)                               | 0.3                                          | 0                                             |

Values in parentheses are for the high-resolution shell. ESRF, European Synchrotron Radiation Facility; SLS, Swiss Light Source; RMSD, root mean square deviation.

<sup>a</sup>  $R_{\text{meas}} = \sum_{hkl} [N/(N-1)]^{1/2} \sum_i |I_i(hkl) - \langle I(hkl) \rangle| / \sum_{hkl} \sum_i I_i(hkl)$ , where  $N$  is the multiplicity of a given reflection.

<sup>b</sup> CC(1/2) values were calculated using the program XDS.

<sup>c</sup>  $R_{\text{factor}}$  and  $R_{\text{free}}$  are given by  $\sum |F_{\text{obs}} - F_{\text{calc}}| / \sum F_{\text{obs}}$  with  $R_{\text{free}} = R_{\text{work}}$  calculated using 5% random data excluded from the refinement.

**Table S2. Protein sequences used to generate the phylogenetic tree of Pel3 homologs.**

| Accession number                      | Group            | Name | Species                            | Mutations, secretion systems | Disulfides and cysteine*    | N terminal domain |
|---------------------------------------|------------------|------|------------------------------------|------------------------------|-----------------------------|-------------------|
| Proteobacteria & Firmicutes (enzymes) |                  |      |                                    |                              |                             |                   |
| B9MKT4_3T9G                           | Firmicutes       | Cabe | <i>Caldicellulosiruptor bescii</i> |                              | 5 Cys, No disulfides        | CBM               |
| AOA285I5J8                            | Firmicutes       | Orme | <i>Orenia metallireducens</i>      |                              | 3 Cys                       | Ricin B like      |
| Q9RHW0_1EE6                           | Firmicutes       | Basp | <i>Bacillus sp</i> KSM-P15         |                              | #3 + 1 Cys                  | No                |
| Q9X6Z2                                | Firmicutes       | Paba | <i>Paenibacillus barcinonensis</i> |                              | #3*                         | No                |
| AOA2E3CYN3                            | γ Proteobacteria | Psba | <i>Pseudomonadales bacterium</i>   |                              | 6 Cys, 1 unusual disulfide* | Ricin B like      |
| AOA2D8RH27                            | γ Proteobacteria | Haba | <i>Hahellaceae bacterium</i>       |                              | 6 Cys, 1 unusual disulfide* | Ricin B like      |
| AOA085C4I9                            | Firmicutes       | Basu | <i>Bacillus subtilis</i>           |                              | 1 Cys                       | No                |
| AOA1H2VLD4                            | Firmicutes       | Pasp | <i>Paenibacillus sp. PDC88</i>     |                              | No Cys                      | Ricin B like      |
| AOA2L0F5X3                            | δ Proteobacteria | Soce | <i>Sorangium cellulosum</i>        |                              | No Cys                      | CBM lipoprotein   |
| Proteobacteria (HrpW)                 |                  |      |                                    |                              |                             |                   |
| AOA246SKK6                            | α Proteobacteria | Rhsp | <i>Rhizobium sp. R635</i>          | T3SS, K252T                  | No Cys                      | Nt disorder zone  |
| AOA1I7LW60                            | β Proteobacteria | Mana | <i>Massilia namucuoensis</i>       | T3SS                         | No Cys                      | G,S rich disorder |
| AOA1I1V4D4                            | β Proteobacteria | Acko | <i>Acidovorax konjaci</i>          | T3SS                         | No Cys                      | G,S rich disorder |
| AOA1I6LAK2                            | β Proteobacteria | Misp | <i>Mitsuaria sp. PDC51</i>         |                              | No Cys                      | G,S rich disorder |
| F2JTB7                                | γ Proteobacteria | Mame | <i>Marinomonas mediterranea</i>    | T3SS                         | No Cys                      | G,S rich disorder |
| A8E411                                | γ Proteobacteria | Psvi | <i>Pseudomonas viridiflava</i>     | T3SS, K252T                  | No Cys                      | Gly rich disorder |
| J3GJW8                                | γ Proteobacteria | Pssp | <i>Pseudomonas sp. GM50</i>        | T3SS, K252T                  | No Cys                      | G,S rich disorder |
| J3DN95                                | γ Proteobacteria | Pssp | <i>Pseudomonas sp. GM102</i>       | T3SS, K252T                  | No Cys                      | G,S rich disorder |
| E0SCP0                                | γ Proteobacteria | Dida | <i>Dickeya dadantii 3937</i>       | T3SS, K252T                  | No Cys                      | G,S rich disorder |
| AOA2K8QM43                            | γ Proteobacteria | Difa | <i>Dickeya fangzhongdai</i>        | T3SS, K252T                  | No Cys                      | G,S rich disorder |
| Q6RK52                                | γ Proteobacteria | Peat | <i>Pectobacterium atrosepticum</i> | T3SS, K252T                  | No Cys                      | G,S rich disorder |
| AOA221TA52                            | γ Proteobacteria | Peca | <i>Pectobacterium carotovorum</i>  | T3SS, K252T                  | No Cys                      | G,S rich disorder |
| Actinobacteria II                     |                  |      |                                    |                              |                             |                   |
| AOA2S5VX08                            | Actinobacteria   | Clmi | <i>Clavibacter michiganensis</i>   | K252T                        | #3, 4 and 5                 | N-terminal TMS    |

|                       |                  |           |                                        |       |                     |                        |
|-----------------------|------------------|-----------|----------------------------------------|-------|---------------------|------------------------|
| A5CLX7                | Actinobacteria   | Clmi      | <i>Clavibacter michiganensis</i>       | K252S | #3, 4 and 5         | N-terminal extension   |
| B0RG35                | Actinobacteria   | Clmi      | <i>Clavibacter sepedonicus</i>         | K252T | #3, 4 and 5         | No                     |
| Nematodes II          |                  |           |                                        |       |                     |                        |
| A0A023NDI5            | Nematoda         | Glro      | <i>Globodera rostochiensis</i>         |       | #3, 4, 5 + 3 Cys    | No                     |
| Q53EK1                | Nematoda         | Glro      | <i>Globodera rostochiensis</i>         |       | #3, 4, 5 + 3 Cys    | No                     |
| H6SWR2                | Nematoda         | Hegl      | <i>Heterodera glycines</i>             |       | #3, 4, 5 + 3 Cys    | No                     |
| H6SWR1                | Nematoda         | Hegl      | <i>Heterodera glycines</i>             |       | #3, 4, 5 + 3 Cys    | No                     |
| H6SWR0                | Nematoda         | Hegl      | <i>Heterodera glycines</i>             |       | #3, 4, 5 + 3 Cys    | No                     |
| A3F5B9                | Nematoda         | Hesc      | <i>Heterodera schachtii</i>            |       | #3, 4, 5 + 3 Cys    | No                     |
| H6SWR3                | Nematoda         | Hegl      | <i>Heterodera glycines</i>             |       | #3, 4, 5 + 3 Cys    | No                     |
| Nematodes III         |                  |           |                                        |       |                     |                        |
| E5D240                | Nematoda         | Heav      | <i>Heterodera avenae</i>               | R255C | #2, 3, 4, 5 + 3 Cys | FD-like domain         |
| F2YA46                | Nematoda         | Glpa      | <i>Globodera pallida</i>               | R255C | #2, 3, 4, 5 + 3 Cys | No                     |
| A3F5C0                | Nematoda         | Hesc      | <i>Heterodera schachtii</i>            | R255C | #2, 3, 4, 5 + 3 Cys | No                     |
| Proteobacteria (Pel3) |                  |           |                                        |       |                     |                        |
| S9PKB9                | δ Proteobacteria | Cyfu      | <i>Cystobacter fuscus DSM2262</i>      | T2SS  | #2, 3, 4 and 5      | No, lipoprotein signal |
| A0A2N4XV85            | β Proteobacteria | Ulsf      | <i>Uliginosibacterium sp. TH139</i>    | T2SS  | #1, 2, 3, 4 and 5   | 60 residue long, 4 Cys |
| A0A2N4XNH5            | β Proteobacteria | Ulsf      | <i>Uliginosibacterium sp. TH139</i>    | T2SS  | #1, 2, 3, 4 and 5   | 60 residue long, 4 Cys |
| A0A437JHM8            | γ Proteobacteria | Rhpa      | <i>Rheinheimera pacifica</i>           | T2SS  | #1, 2, 3, 4 and 5   | Fn3                    |
| A0A1M5WEI0            | γ Proteobacteria | Viae      | <i>Vibrio aerogenes CECT 7868</i>      | T2SS  | #1, 2, 3, 4 and 5   | Fn3                    |
| A0A1Y6BEP8            | γ Proteobacteria | Alba      | <i>Alteromonadaceae bacterium Bs31</i> | T2SS  | #1, 2, 3, 4 and 5   | Fn3 + two CBM          |
| A0A1G9AB09            | γ Proteobacteria | Psin      | <i>Pseudomonas indica</i>              | T2SS  | #1, 2, 3, 4 and 5   | two Fn3                |
| Q47465                | γ Proteobacteria | Peca_Pel3 | <i>Pectobacterium carotovorum</i>      | T2SS  | #1, 2, 3, 4 and 5   | Fn3                    |
| O50325                | γ Proteobacteria | Dida_Pell | <i>Dickeya dadantii</i>                | T2SS  | #1, 2, 3, 4 and 5   | Fn3                    |
| Nematodes I           |                  |           |                                        |       |                     |                        |
| M4VRF2                | Nematoda         | Buxy      | <i>Bursaphelenchus xylophilus</i>      | K252R | #3, 4, 5 + 2 Cys    | No                     |
| Q33CQ0                | Nematoda         | Bumu      | <i>Bursaphelenchus mucronatus</i>      |       | #3, 4 and 5         | No                     |
| Q33CQ3                | Nematoda         | Buxy      | <i>Bursaphelenchus xylophilus</i>      |       | #3, 4 and 5         | No                     |
| Q33CQ1                | Nematoda         | Bumu      | <i>Bursaphelenchus mucronatus</i>      |       | #3, 4 and 5         | No                     |
| Q33CQ4                | Nematoda         | Buxy      | <i>Bursaphelenchus xylophilus</i>      |       | #3, 4 and 5         | No                     |
| Actinobacteria I      |                  |           |                                        |       |                     |                        |
| C6WMH1                | Actinobacteria   | Acmi      | <i>Actinosynnema mirum</i>             |       | #3, 4 and 5         | No                     |



|                |                |      |                                                       |              |                                             |                        |
|----------------|----------------|------|-------------------------------------------------------|--------------|---------------------------------------------|------------------------|
| AOA0X3V446     | Actinobacteria | Acaw | <i>Actinoplanes awajinensis subsp. mycoplanecinus</i> |              | #3, 4 and 5                                 | TAT signal + CBM       |
| AOA2R4JZH5     | Actinobacteria | Stsp | <i>Streptomyces sp. P3</i>                            | K252E        | #3, 4 and 5                                 | TAT signal             |
| AOA0A0B7Q7     | Actinobacteria | Cece | <i>Cellulomonas cellasea</i>                          |              | #3, 4 and 5                                 | RicinB                 |
| AOA162JQF4     | Actinobacteria | Frsp | <i>Frankia sp. EI5c</i>                               |              | #3, 4 and 5                                 | CBM22                  |
| AOA2R4FVW9     | Actinobacteria | Plsp | <i>Plantactinospora sp. BB1</i>                       | K252T        | #3, 4, 5 + 2 Cys                            | Ricin B like           |
| AOA136PXY2     | Actinobacteria | Miro | <i>Micromonospora rosaria</i>                         |              | #3, 4, 5 + 2 Cys                            | Ricin B like           |
| AOA1Q4X116     | Actinobacteria | Sasp | <i>Saccharothrix sp. CB00851</i>                      |              | #3, 4 and 5                                 | Ricin B like           |
| Nematodes IV   |                |      |                                                       |              |                                             |                        |
| AOA0H3U5M6     | Nematoda       | Megr | <i>Meloidogyne graminicola</i>                        | K252R        | #3, 4, 5 + 3 Cys (1 unusual disulfide*)     | No                     |
| E2JE18         | Nematoda       | Meen | <i>Meloidogyne enterolobii</i>                        | K252R        | #3, 4, 5 + 6 Cys (1 unusual disulfide*)     | No                     |
| Q7YW99         | Nematoda       | Mein | <i>Meloidogyne incognita</i>                          | K252R        | #3, 4, 5 + 6 Cys (1 unusual disulfide*)     | No                     |
| Q8WR49         | Nematoda       | Meja | <i>Meloidogyne javanica</i>                           | K252R        | #3, 4, 5 + 6 Cys (1 unusual disulfide*)     | No                     |
| Fungi          |                |      |                                                       |              |                                             |                        |
| AOA1Y3NI05     | Fungi          | Pysp | <i>Piromyces sp.</i>                                  |              | #2, 3, 4, 5+2 Cys (1 unusual disulfide*)    | CBM1                   |
| AOA1B7XSU6     | Fungi          | Cohi | <i>Colletotrichum higginsianum</i>                    |              | #2, 3, 4, 5 + 5 Cys (2 unusual disulfides*) | CBM1                   |
| AOA0NOV4Y2     | Fungi          | Fula | <i>Fusarium langsethiae</i>                           | K252T, R255Q | only #2 and 4 + 1 Cys                       | N-terminal extension   |
| Oomycota       |                |      |                                                       |              |                                             |                        |
| AOA2P4XIG7     | Oomycota       | Phpa | <i>Phytophthora palmivora var. palmivora</i>          |              | #2, 3, 4 and 5                              | No                     |
| AOA2D4BN86     | Oomycota       | Pyin | <i>Pythium insidiosum</i>                             |              | #2, 3, 4 and 5                              | C-terminal extension   |
| XP_024585360.1 | Oomycota       | Plha | <i>Plasmopara halstedii</i>                           |              | #2, 3, 4 and 5                              | No                     |
| XP_024581403.1 | Oomycota       | Plha | <i>Plasmopara halstedii</i>                           |              | #2, 3, 4 and 5                              | No                     |
| Fungi          |                |      |                                                       |              |                                             |                        |
| AOA286UX89     | Fungi          | Pyno | <i>Pyrrhoderma noxium</i>                             |              | #2, 3, 4 and 5                              | two C-terminal domains |
| AOA166MUN7     | Fungi          | Coin | <i>Colletotrichum incanum</i>                         |              | #2, 3, 4, 5 + 4 Cys (2 unusual disulfides*) | CBM1 & DE-rich         |

|            |       |      |                                                |       |                                             |                       |
|------------|-------|------|------------------------------------------------|-------|---------------------------------------------|-----------------------|
| G2WR80     | Fungi | Veda | <i>Verticillium dahliae</i>                    |       | #2, 3, 4, 5 + 4 Cys (2 unusual disulfides*) | DEK-rich              |
| A0A0C3QVC1 | Fungi | Tuca | <i>Tulasnella calospora</i>                    |       | #2, 3, 4, 5 + 4 Cys (2 unusual disulfides*) | CBM1                  |
| A0A1G4BBA2 | Fungi | Coor | <i>Colletotrichum orchidophilum</i>            |       | #2, 3, 4, 5 + 2 Cys (1 unusual disulfide*)  | C-terminal PBP domain |
| A0A163KWW1 | Fungi | Dira | <i>Didymella rabiei</i>                        |       | #2, 3, 4 and 5                              | C-terminal domain     |
| N4VGC5     | Fungi | Coor | <i>Colletotrichum orbiculare</i>               |       | #2, 3, 4 and 5                              | D-rich                |
| A0A0J9VDT7 | Fungi | Fuox | <i>Fusarium oxysporum f. sp. lycopersici</i>   |       | #2, 3, 4 and 5                              | C-terminal DEK-rich   |
| K1WX96     | Fungi | Mabr | <i>Marssonina brunnea f. sp. multigermtubi</i> | K252T | #2, 3, 4 and 5                              | DEK-rich              |

\* - The occurrence of disulfide bonds equivalent to #1, 2, 3, 4 and 5 of Pel3 was verified by structure-based sequence alignments using ESPript server and by protein structure modelling using Swiss Model server (57,58).

**Table S3. Heuristic PDB search performed with the Dali server (33) using monomer B of PDB 4U49 as query structure. The first 44 selected PDB entries are shown.**

| No | PDB-Chain | Z    | rmsd | lali | nres | %id | PDB Description                                  |
|----|-----------|------|------|------|------|-----|--------------------------------------------------|
| 1  | 4U49-B    | 21.0 | 0.1  | 89   | 318  | 100 | PECTATE LYASE                                    |
| 2  | 4U4B-A    | 18.2 | 1.0  | 89   | 326  | 100 | PECTATE LYASE                                    |
| 3  | 4U49-A    | 18.1 | 1.0  | 85   | 311  | 100 | PECTATE LYASE                                    |
| 4  | 3B8Y-A    | 17.9 | 0.7  | 87   | 304  | 48  | ENDO-PECTATE LYASE                               |
| 5  | 3B4N-A    | 17.5 | 1.0  | 88   | 314  | 49  | ENDO-PECTATE LYASE                               |
| 6  | 3B4N-B    | 17.3 | 1.1  | 88   | 314  | 49  | ENDO-PECTATE LYASE                               |
| 7  | 3B8Y-B    | 16.6 | 0.7  | 82   | 294  | 50  | ENDO-PECTATE LYASE                               |
| 8  | 3MPC-A    | 12.5 | 1.7  | 84   | 96   | 25  | FN3-LIKE PROTEIN                                 |
| 9  | 5E53-B    | 11.7 | 2.1  | 85   | 296  | 9   | CONTACTIN-1                                      |
| 10 | 4Q58-D    | 11.6 | 1.9  | 84   | 194  | 11  | PLECTIN                                          |
| 11 | 1QG3-B    | 11.5 | 1.9  | 84   | 193  | 11  | PROTEIN (INTEGRIN BETA-4 SUBUNIT)                |
| 12 | 5E53-A    | 11.5 | 2.1  | 85   | 288  | 9   | CONTACTIN-1                                      |
| 13 | 1CFB-A    | 11.4 | 1.8  | 82   | 205  | 15  | DROSOPHILA NEUROGLIAN                            |
| 14 | 3F7P-C    | 11.4 | 2.0  | 84   | 200  | 11  | PLECTIN-1                                        |
| 15 | 4UI2-A    | 11.4 | 1.8  | 86   | 201  | 10  | NEOGENIN                                         |
| 16 | 3F7P-D    | 11.3 | 2.0  | 84   | 196  | 11  | PLECTIN-1                                        |
| 17 | 5E45-A    | 11.3 | 1.9  | 83   | 301  | 8   | CONTACTIN-4                                      |
| 18 | 3F7Q-B    | 11.3 | 2.0  | 84   | 214  | 11  | INTEGRIN BETA-4                                  |
| 19 | 1QG3-A    | 11.3 | 2.0  | 84   | 195  | 11  | PROTEIN (INTEGRIN BETA-4 SUBUNIT)                |
| 20 | 3F7Q-A    | 11.3 | 2.0  | 84   | 214  | 11  | INTEGRIN BETA-4                                  |
| 21 | 5E53-D    | 11.3 | 2.0  | 84   | 301  | 10  | CONTACTIN-1                                      |
| 22 | 3F7P-E    | 11.2 | 2.0  | 84   | 212  | 11  | PLECTIN-1                                        |
| 23 | 4N68-A    | 11.2 | 2.0  | 84   | 99   | 10  | CONTACTIN-5                                      |
| 24 | 4BQ7-B    | 11.2 | 1.9  | 86   | 202  | 12  | NEOGENIN                                         |
| 25 | 4BQ8-A    | 11.2 | 1.8  | 86   | 195  | 10  | NEOGENIN                                         |
| 26 | 3F7R-A    | 11.1 | 2.1  | 84   | 214  | 11  | INTEGRIN BETA-4                                  |
| 27 | 4BQB-A    | 11.1 | 1.9  | 86   | 195  | 10  | NEOGENIN                                         |
| 28 | 4BQB-B    | 11.1 | 1.9  | 86   | 195  | 10  | NEOGENIN                                         |
| 29 | 2GEE-A    | 11.1 | 2.1  | 83   | 188  | 12  | HYPOTHETICAL PROTEIN                             |
| 30 | 4BQB-C    | 11.1 | 1.9  | 86   | 199  | 10  | NEOGENIN                                         |
| 31 | 4BQ7-A    | 11.1 | 1.9  | 86   | 202  | 10  | NEOGENIN                                         |
| 32 | 4BQ6-A    | 11.0 | 1.9  | 86   | 205  | 10  | NEOGENIN                                         |
| 33 | 4BQ6-B    | 11.0 | 1.9  | 86   | 205  | 10  | NEOGENIN                                         |
| 34 | 4YFD-A    | 11.0 | 1.9  | 84   | 491  | 12  | INTERLEUKIN-1 RECEPTOR ACCESSORY PROTEIN         |
| 35 | 3P4L-A    | 11.0 | 1.9  | 86   | 198  | 10  | NEOGENIN                                         |
| 36 | 4YFG-B    | 11.0 | 1.9  | 85   | 481  | 12  | RECEPTOR-TYPE TYROSINE-PROTEIN PHOSPHATASE DELTA |
| 37 | 1V5J-A    | 10.9 | 1.9  | 85   | 108  | 13  | KIAA1355 PROTEIN                                 |
| 38 | 4BQ9-B    | 10.9 | 2.0  | 86   | 187  | 12  | NEOGENIN                                         |
| 39 | 4BQB-D    | 10.9 | 1.9  | 86   | 203  | 10  | NEOGENIN                                         |
| 40 | 4BQC-B    | 10.9 | 2.0  | 86   | 176  | 10  | NEOGENIN                                         |
| 41 | 4YFG-A    | 10.9 | 1.9  | 84   | 481  | 12  | RECEPTOR-TYPE TYROSINE-PROTEIN PHOSPHATASE DELTA |
| 42 | 5E53-C    | 10.9 | 2.1  | 84   | 292  | 10  | CONTACTIN-1                                      |
| 43 | 6MFA-A    | 10.9 | 2.0  | 82   | 363  | 11  | FIBRONECTIN                                      |
| 44 | 3T1W-A    | 10.8 | 2.1  | 84   | 368  | 14  | FOUR-DOMAIN FIBRONECTIN FRAGMENT                 |

**Table S4. Plasmids used in this study**

| Plasmid         | Genotype/phenotype                                                                                                       | Reference  |
|-----------------|--------------------------------------------------------------------------------------------------------------------------|------------|
| pBS             | Bluescript KS+, ColE1, Ap <sup>R</sup>                                                                                   | Stratagene |
| pBS-PLI         | pBS carrying <i>pell</i> of <i>D. dadantii</i> 3937                                                                      | (20)       |
| pBS-PL3         | pBS carrying <i>pel3</i> of <i>P. carotovorum</i> 71                                                                     | (20)       |
| pBS-h16         | pBS carrying a chimeric <i>pell-pel3</i> encoding residues M1-D91 from Pel3 and V90-L344 from Pell                       | This work  |
| pBS-h16-2       | pBS-h16 carrying additional substitutions in the loop 2 of Fn3 domain: A43E, G44S, N45K                                  | This work  |
| pBS-h16-3       | pBS-h16 carrying additional substitutions in the loop 3 of Fn3 domain: S54G, S56T, A58N, Q59P, A60D, G61L, S62R          | This work  |
| pBS-h16-4       | pBS-h16 carrying additional substitutions in the loop 4 of Fn3 domain: N69D, S70A, S71E, D72T                            | This work  |
| pBS-h16-5       | pBS-h16 carrying additional substitutions in the loop 5 of Fn3 domain: L78A, T79D, A80T, P82S, Q83G, S84L, D85N          | This work  |
| pBS-h16-3,2     | pBS-h16-3 carrying additional substitutions in the loop 2 of Fn3 domain: A43E, G44S, N45K                                | This work  |
| pBS-h16-3,4     | pBS-h16-3 carrying additional substitutions in the loop 4 of Fn3 domain: N69D, S70A, S71E, D72T                          | This work  |
| pBS-h16-3,5     | pBS-h16-3 carrying additional substitutions in the loop 5 of Fn3 domain: L78A, T79D, A80T, P82S, Q83G, S84L, D85N        | This work  |
| pBS-h18         | pBS carrying a chimeric <i>pell-pel3</i> encoding residues M1-A128 from Pel3 and T126-L344 from Pell                     | This work  |
| pBS-h18-C       | pBS-h18 carrying additional substitutions in the loop T1.8 of catalytic domain: N316K, E319V, K322Q, K324S, S325T, D326E | This work  |
| pBS-h18-B,C     | pBS-h18-C carrying additional substitutions in the loop T3.4 of catalytic domain: T217A, T218K, N219D, P221Y             | This work  |
| pBS-h27         | pBS carrying a chimeric <i>pell-pel3</i> with several substitutions shown on Fig. 3B and S9                              | This work  |
| pBS-h33         | pBS carrying a chimeric <i>pell-pel3</i> with several substitutions shown on Fig. 3B and S9                              | This work  |
| pBS-h35         | pBS carrying a chimeric <i>pell-pel3</i> with several substitutions shown on Fig. 3B and S9                              | This work  |
| pBS-PLI_70/240C | pBS-PLI carrying T70C and N240C substitutions                                                                            | This work  |
| pBS-PLIstp      | pBS-PLI carrying amber stop codon in the place of P107                                                                   | This work  |

**Table S5. Primers employed in the study**

| Primer                       | Nucleotide sequence (5'-3') <sup>b</sup>                           | Generated mutation                       |
|------------------------------|--------------------------------------------------------------------|------------------------------------------|
| Pel3_PS <sup>a</sup>         | cttttcaggctcaggctgctcagaccatgctgatgctgctg                          | D22A, D23Q                               |
| Pel3_lp2asl <sup>a</sup>     | ttaagctggctaccgatgaaagcaagttgttcgccaggatgtg                        | A43E, G44S, N45K                         |
| Pel3_lp3asl <sup>a</sup>     | gttcgccaggatgtgtatcgcggcaccactagtaatccggatctccgcgaaaaatcgcagagctc  | S54G, S56T, A58N, Q59P, A60D, G61L, S62R |
| Pel3_lp4asl_sh <sup>a</sup>  | gcgaaaaaatcgcagagctcagtgccgagaccagaacctttaccgatttaaccg             | N69D, S70A, S71E, D72T                   |
| Pel3_lp5asl <sup>a</sup>     | ccagcgacagaacctttaccgatgcagacaccaattcagggttaactattggattgggtggatacc | L78A, T79D, A80T, P82S, Q83G, S84L, D85N |
| Pel3_lp6asl <sup>a</sup>     | gggtggataccgtagcagaatcaggccagggtggtatctaagtctgcctcaacagc           | G95E, N97Q, S98A, V99Q, L100V, K101V     |
| Pel3_T3.1asl <sup>a</sup>    | gtggtattacgctgggtacagagctgtcccaatgacagtgataaacagcc                 | L144T, S147P, G148N                      |
| Pel3_T3.4asl <sup>a</sup>    | gtcggcgggtgtggcacataacgccaaagatggttatggcggcaaacggacaaagt           | T217A, T218K, N219D, P221Y               |
| Pel3_T1.8asl_Ct <sup>a</sup> | cggtgtagaaaaagggcaaggaagcaccgagaaatacggagagtcttg                   | K322Q, K324S, S325T, D326E               |
| Pel3_T1.8asl_Nt <sup>a</sup> | ggtatgtgaagagtttaaagggttagtaaaagggcaaggaagcaccg                    | N316K, E319V, K322Q                      |
| Pel3_Ehe <sup>a</sup>        | ccagaatgtaaagccggcgcgtaattaaagataaaaccg                            | <i>EheI</i> site covering G127 and A128  |
| Pel3_Aat <sup>a</sup>        | ctattggtattgggtggacgctcgttagcggtaataatagcg                         | <i>AatII</i> site, T92V                  |
| Pell_T70C <sup>a</sup>       | cgccgtgctggacgcggaatgcccgtacctttaaagatgccgac                       | T70C                                     |
| Pell_N240C <sup>a</sup>      | gcaccaccgtggtgaagggtgcttcaccctgaccggtgaacac                        | N240C                                    |
| Pell_NtSt <sup>a</sup>       | gacggttatggcggcaaatgagacaaagtctgcagcac                             | P222tga                                  |
| Pel3_EcoRV <sup>a</sup>      | cttttcaggctcaggctgataccacatgctgatgctgctg                           | <i>EcoRV</i> site, D23I                  |

<sup>a</sup> For each primers used in site directed mutagenesis, another primer with reverse complementary sequence was used (not shown).

<sup>b</sup> Mutated or introduced bases are in bold and underlined.

## Supporting Experimental procedures

### *Plasmid constructions*

To generate pBS-h16 plasmid carrying chimeric *pell-pel3* gene encoding the residues M1-D91 from Pel3 and V90-L344 from Pell, an *AatII* site was introduced into the *pel3* gene in the zone coding for T92 using Pel3\_Aat primer pair (Table S5). Next, the 5' region of *pel3* was fused to the 3' region of *pell* through the *AatII* site. To generate pBS-h18 plasmid carrying chimeric *pell-pel3* gene encoding the residues M1-A128 from Pel3 and T126-L344 from Pell, an *EheI* site was introduced into *pel3* in the zone coding for G127 and A128 using Pel3\_Ehe primer pair (Table S5). Next, the 5' region of *pel3* was fused to the 3' region of *pell* through the *EheI* site. Additional substitutions in h16 and h18 derivatives was introduced by site-directed mutagenesis with the PrimeSTAR Max DNA Polymerase (TaKaRa) using the appropriate primer pairs listed in Table S5. To generate pBS-h33, the multiple substitutions shown on Fig. S9, were sequentially introduced by site-directed mutagenesis using the appropriate primer pairs listed on Table S5. To generate pBS-h27, an *AatII* site was introduced into the *h16-3,5* gene in the zone coding for T92 using Pel3\_Aat primer pair (Table S5). Next, the 5' region of *h16-3,5* was fused to the 3' region of *h18\_B,C* through the *AatII* site.
